# Supplementary material for: Supercritical hydrothermal synthesis of MoS2 nanosheets with controllable layer number and phase structure
Source: Royal Society of Chemistry journal article supplement (doi:10.1039/d0dt01453b), 2020-01-01
Supplement: d0dt01453b1.pdf [file d0dt01453b1.pdf]

## SUPPORTING INFORMATION

### Supercritical Hydrothermal Synthesis of MoS<sub>2</sub> Nanosheets with Controllable Layer Number and Phase Structure

Yuki Takahashi<sup>a</sup>, Yuta Nakayasu<sup>\*b</sup>, Kazuyuki Iwase<sup>a</sup>, Hiroaki Kobayashi<sup>a</sup>, and Itaru Honma<sup>a</sup>

a. *Institute of Multidisciplinary Research for Advanced Materials, Tohoku University, 2-1-1, Katahira, Aoba-ku, Sendai 980-8577, Japan.*

b. *Frontier Research Institute for Interdisciplinary Sciences, Tohoku University, 6-6-11 Aoba, Aza, Aramaki, Aoba-ku, Sendai, Miyagi 980-8578 Japan.*

\*Corresponding author: [nakayasu@tohoku.ac.jp](mailto:nakayasu@tohoku.ac.jp)

Tel: 022(217)5816; Fax: 022(217)5828

Total number of pages: 11

Total number of figures: 9

Total number of tables: 4

#### Table of Contents

|                |     |
|----------------|-----|
| Figure S1..... | S2  |
| Figure S2..... | S3  |
| Figure S3..... | S4  |
| Figure S4..... | S5  |
| Figure S5..... | S7  |
| Figure S6..... | S8  |
| Figure S7..... | S9  |
| Figure S8..... | S10 |
| Figure S9..... | S11 |
| Table S1.....  | S3  |
| Table S2.....  | S5  |
| Table S3.....  | S6  |
| Table S4.....  | S6  |

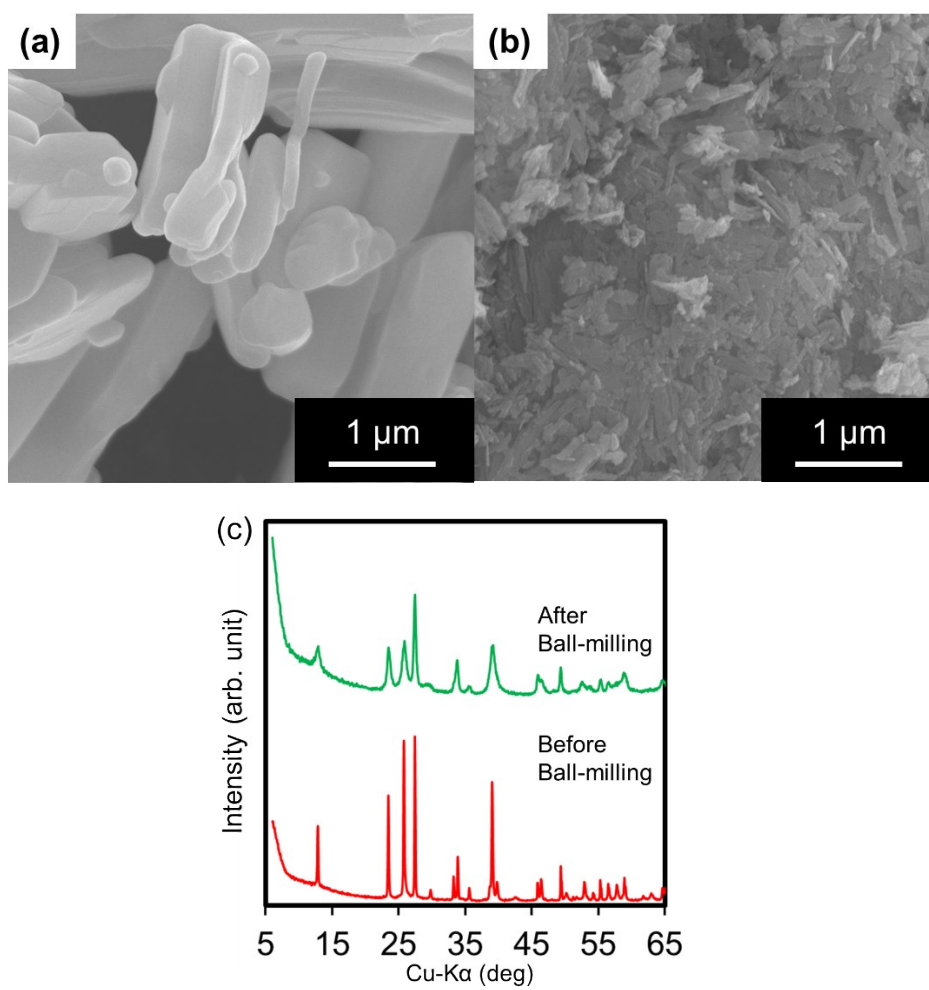

**Figure S1** SEM images of (a) pristine  $\text{MoO}_3$  and (b) Ball-milled  $\text{MoO}_3$ , (c) The XRD patterns of  $\text{MoO}_3$  before and after the ball-milling

**Table S1** FWHM of 100 plane of synthesized in 30 mins at different reaction temperature.

| Temperature [°C] | Degree [2 $\theta$ ] | FWHM |
|------------------|----------------------|------|
| 400              | 33.5                 | 1.74 |
| 350              | 33.3                 | 1.84 |
| 300              | 33.3                 | 3.00 |

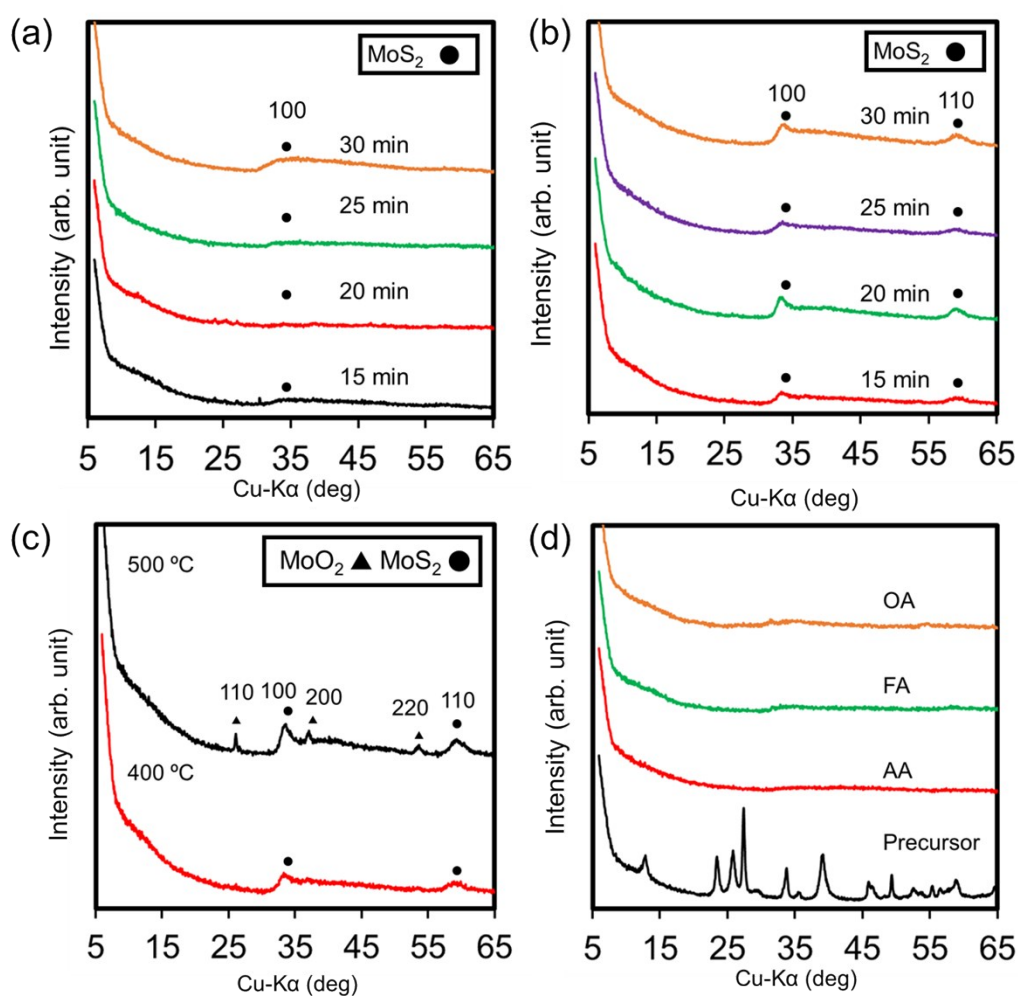

**Figure S2** The XRD patterns of synthesized samples (a) Products synthesized with AA as a reducing agent in 300°C for different reaction times (b) Products synthesized with AA as a reducing agent at 350°C for different reaction times (c) Products synthesized with AA as a reducing agent at 500°C for 30 min (d) Products synthesized at 200°C for 24 hour with different reducing agents.

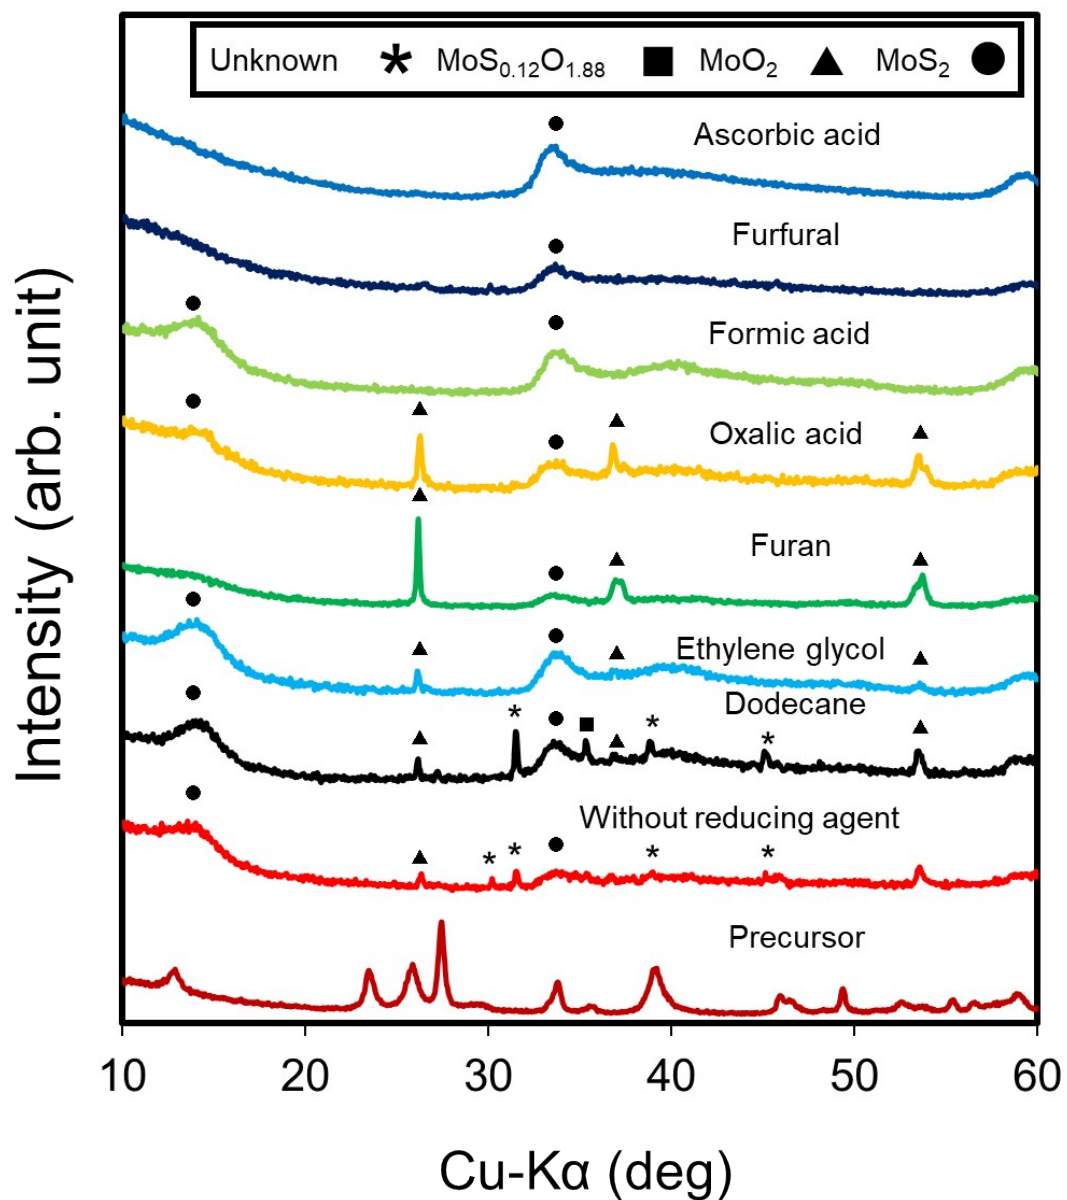

Figure S3 The result of XRD patterns of samples synthesized using different organic substances

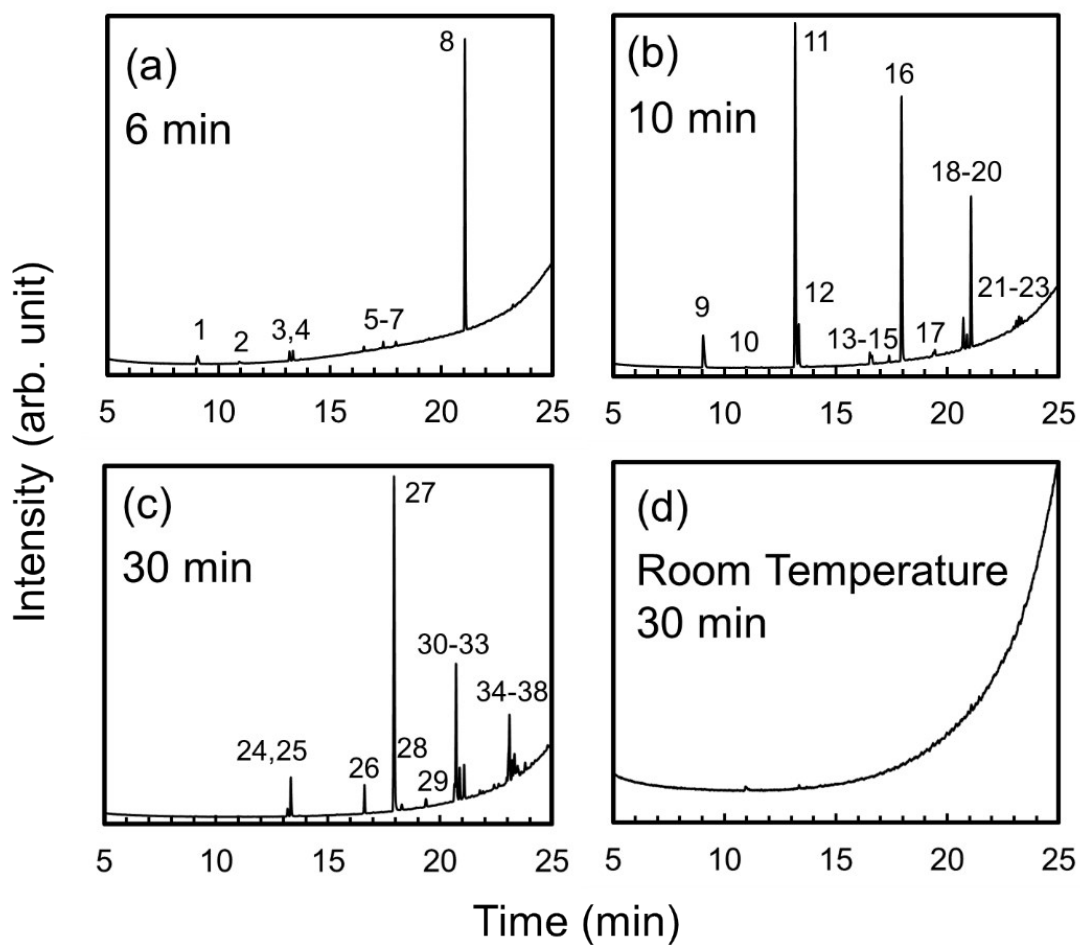

**Figure S4** The results of GC-MS measurement for filtrate after MoS<sub>2</sub> synthesis reaction with AA under different conditions (a) 400°C, 6 min (b) 400°C, 10 min (c) 400°C, 30 min (d) Room temperature, 30 min

**Table S2** The result of GC-MS measurement for filtrate after the reaction (AA 6 min)

| Time [min] | Peak number | Name of substance |
|------------|-------------|-------------------|
| 9.0543     | 1           | Acetaldehyde      |
| 10.9285    | 2           | Ethanol           |
| 13.184     | 3           | Furan             |
| 13.3366    | 4           | Acetone           |
| 16.5292    | 5           | Diacetyl          |
| 17.39      | 6           | Crotonaldehyde    |
| 17.9567    | 7           | Thiophene         |
| 21.0512    | 8           | Furfural          |

**Table S3** The result of GC-MS measurement for filtrate after the reaction (AA 10 min)

| <b>Time [min]</b> | <b>Peak number</b> | <b>Name of substance</b> |
|-------------------|--------------------|--------------------------|
| 9.0544            | 9                  | Acetaldehyde             |
| 10.9721           | 10                 | Ethanol                  |
| 13.1732           | 11                 | Furan                    |
| 13.3367           | 12                 | Acetone                  |
| 16.5838           | 13                 | 2-Methylfuran            |
| 16.7908           | 14                 | 3-Methylfuran            |
| 17.3901           | 15                 | Crotonaldehyde           |
| 17.9458           | 16                 | Thiophene                |
| 19.3841           | 17                 | 2-Ethylfuran             |
| 20.7135           | 18                 | 3-Methylthiophene        |
| 20.877            | 19                 | 3-Methylthiophene        |
| 21.0622           | 20                 | Furfural                 |
| 23.0998           | 21                 | 2-Ethylthiophene         |
| 23.2197           | 22                 | 2,4-Dimethylthiophene    |
| 23.2177           | 23                 | 2,3-Dimethylthiophene    |

**Table S4** The result of GC-MS measurement for filtrate after the reaction (AA 30 min)

| <b>Time [min]</b> | <b>Peak number</b> | <b>Name of substance</b>     |
|-------------------|--------------------|------------------------------|
| 13.1842           | 24                 | Furan                        |
| 13.3368           | 25                 | Acetone                      |
| 16.6275           | 26                 | 2-Butanone                   |
| 17.9459           | 27                 | Thiophene                    |
| 18.2837           | 28                 | 1,3-Hexadien-5-yne           |
| 19.3624           | 29                 | 2-Pentanone                  |
| 20.6482           | 30                 | Cyclopentanone               |
| 20.7136           | 31                 | 3-Methylthiophene            |
| 20.8771           | 32                 | 3-Methylthiophene            |
| 21.0732           | 33                 | Toluene                      |
| 22.98             | 34                 | 2-Methyl-2-cyclopenten-1-one |
| 23.089            | 35                 | 2-Ethylthiophene             |
| 23.2198           | 36                 | 2,5-Dimethylthiophene        |
| 23.3178           | 37                 | 2,4-Dimethylthiophene        |
| 23.7973           | 38                 | p-Xylene                     |

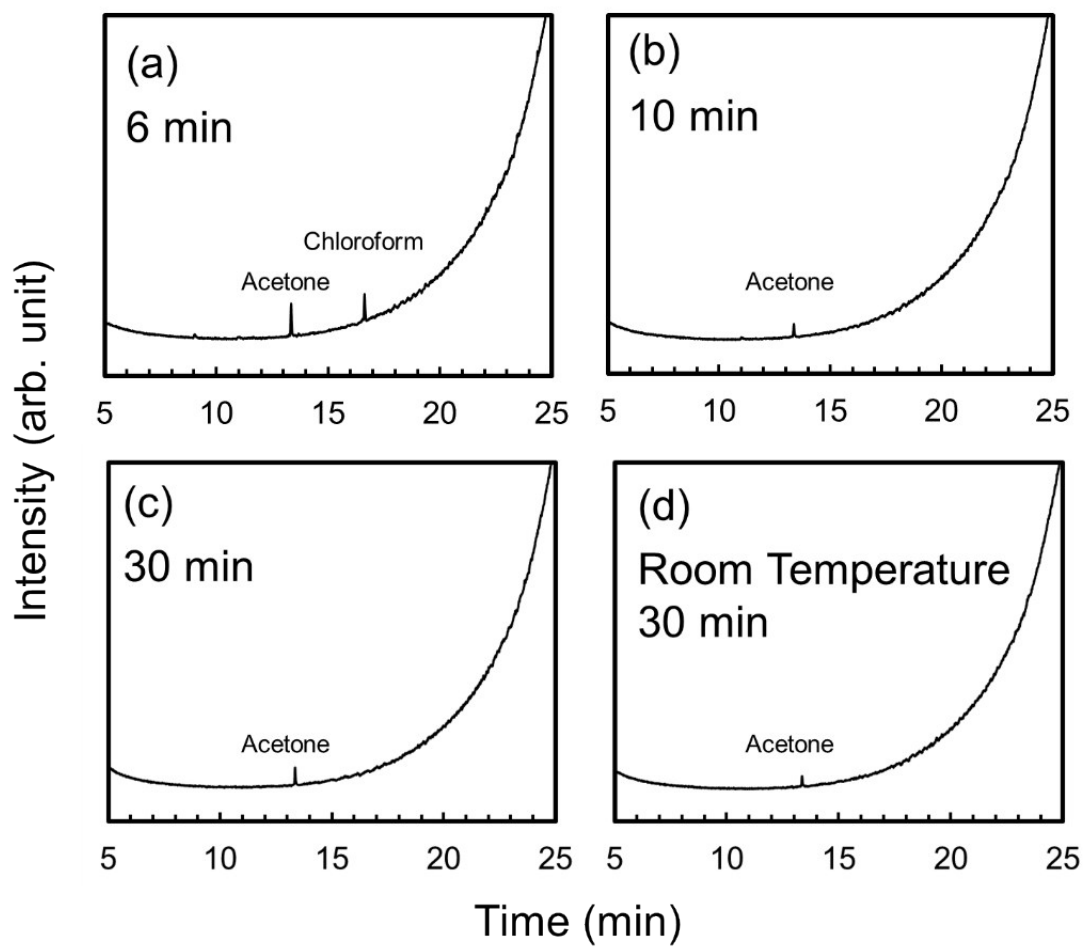

**Figure S5** The results of GC-MS measurement for filtrate after the MoS<sub>2</sub> synthesis reaction with FA  
(a) 400°C, 6 min (b) 400°C, 10 min (c) 400°C, 30 min (d) Room temperature, 30min

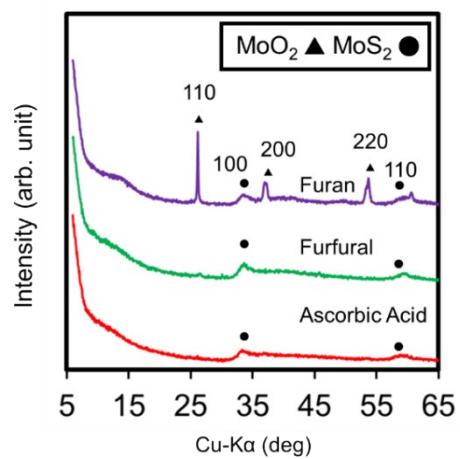

**Figure S6** The comparison of XRD patterns of samples synthesized with Furan, Furfural and ascorbic acid. Furan and Furfural is formed by decomposition of AA.



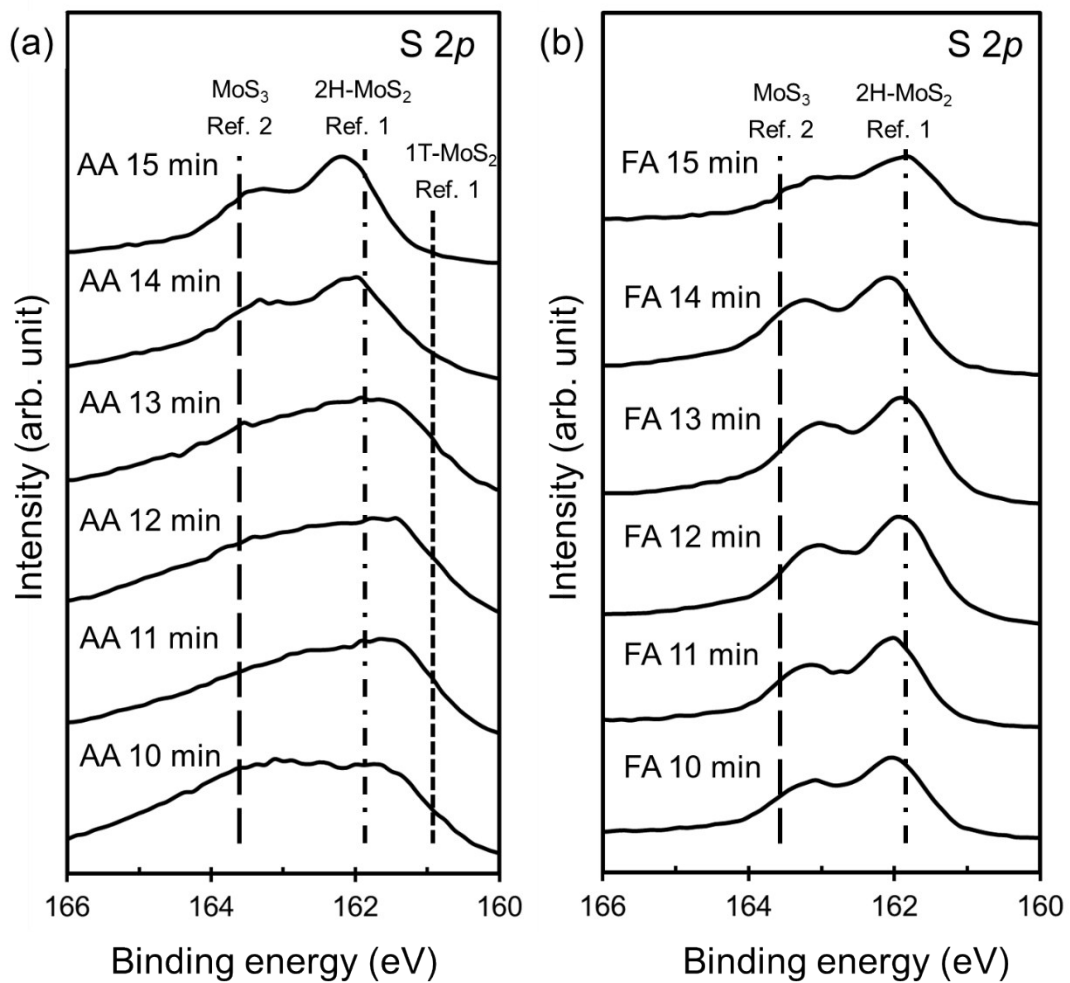

**Figure S7** XPS spectra of synthesized samples. (a) Products synthesized with AA as a reducing agent for different reaction times. (b) Products synthesized with FA as a reducing agent for different reaction times.

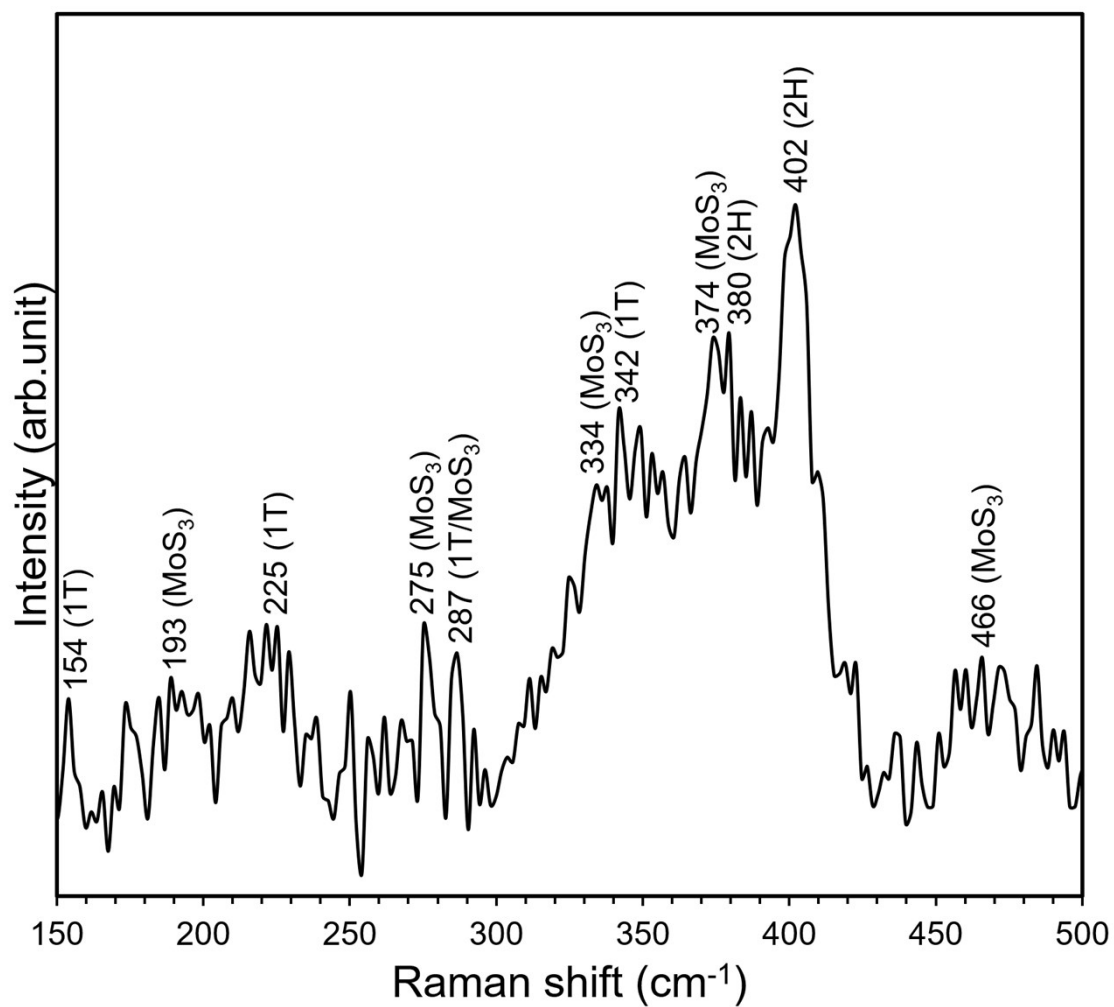

**Figure S8** Raman spectrum of the sample synthesized with AA for 12 min.

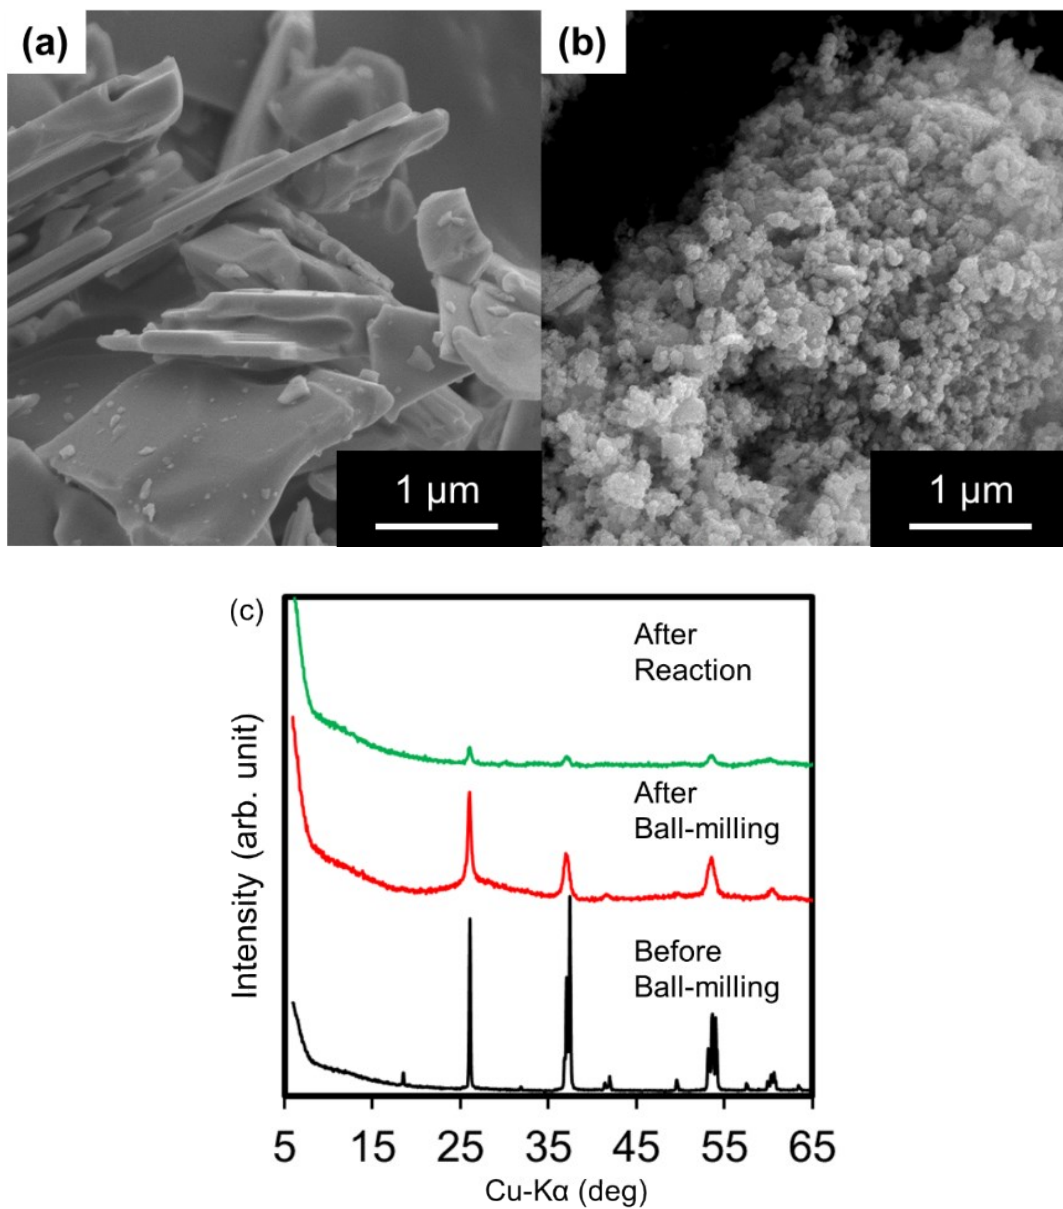

**Figure S9** SEM images of (a) pristine MoO<sub>2</sub> and (b) Ball-milled MoO<sub>2</sub>, (c) The XRD patterns of synthesized samples using MoO<sub>2</sub> as a precursor and AA as a reducing agent for 30 mins.
